# Supplementary material
Source: PubMed Central journal article supplement (PMC2617752)
Supplement: NIHMS39478-supplement-supplement.pdf [file NIHMS39478-supplement-supplement.pdf]

## SUPPLEMENTARY MATERIAL

### S1. MIDAS format

Metadata in *DataRail* and SBWiki is based on MIDAS (Minimum Information for Data Analysis in Systems Biology). MIDAS is derived from other minimum-information models, particularly MIACA (Minimum Information about a Cellular Assay), which in turn includes terms from GO (Gene Ontology), with several additions. Most importantly, each MIDAS file has a unique identifier (UID) composed of the following fields: (i) a two-letter data/file-type code (e.g., PD for Primary Data, MD for multiplex data), (ii) a three-letter creator code (typically initials), (iii) an identification number of arbitrary length that is unique across the entire system, and (iv) a free-text suffix that serves as a mnemonic to improve human readability. For example, the primary data discussed in the text might be tagged MD-LGA-11111-CytoInh17phFI-BLK (where MD denotes the Multiplex Data file type and LGA (after author L. G. Alexopoulos). The UID provides a convenient and unique “pointer” for referencing data files, and its integration with SBWiki provides a convenient repository for the data and metadata. These UID are generated and catalogued in the SBWiki (Muhlich *et al.*, unpublished data).

Each column in a MIDAS file contains a header that begins with a two-letter prefix that describes its function: ID for identifiers, TR for treatments, DA for data acquisition, and DV for data values. MIDAS files can also include the concept of cues, signals, and responses (Gaudet *et al.*, 2005): *cues* are biological perturbations to a system (such as the addition of extracellular ligands), *signals* represent the activities of proteins or other biomolecules involved in transducing biological information (activation of an intracellular kinase, for example), and *responses* represent phenotypic changes such as proliferation, cell death or cytokine release. Accordingly, the column headers in a MIDAS files may contain a second (user-selected) level of identification (e.g. headers for columns describing various cytokine treatments might begin with “TR:Cytokine”). When present, these secondary identifiers allow *DataRail*’s importer to identify automatically the dimensions of a new compendium.

### S2. Handling data from multiple sets of data

*DataRail*, thanks to its intrinsic flexibility, provides a technical means to handle data consolidation and bundling either at the level of a `project` (defining a `compendium` for each source of data), the level of the `compendium` (using different `arrays` for different sets of data) or even at the level of an `array`. For example, as a complementary experiment to the CSR Compendium presented here, we have measured cell death with the Cytotoxicity Detection Kit LDH using a plate reader. This data can easily be added to an array containing the micro-Elisa data by increasing the number of dimensions.

When the user tries to load a new file and a compendium is already loaded, *DataRail* will ask the user to either (i) replace the compendium with the new data, (ii) add the data as a new array to the current compendium, (iii) add the data as a different compendium to the same project, or (iv) append the data to another array in current compendium. Importantly, the append function works only when the array to be appended is identical in dimensionality and type to the target array. It is also possible to perform a transformation on one or more primary data arrays and subsequently to join them. In this case, the user specifies how multiple dimensions can be collapsed into a single dimension.

### S3. *DataRail* Documentation

More detailed documentation of *DataRail* is available as a separate PDF file and as help files that are accessible from the MATLAB documentation browser. Prior to publication, *DataRail* and its documentation will be available at <http://web.mit.edu/goldsipe/www/DataRail/>. After publication, this URL will redirect to a more permanent repository (<http://code.google.com/p/sbpipeline/>).

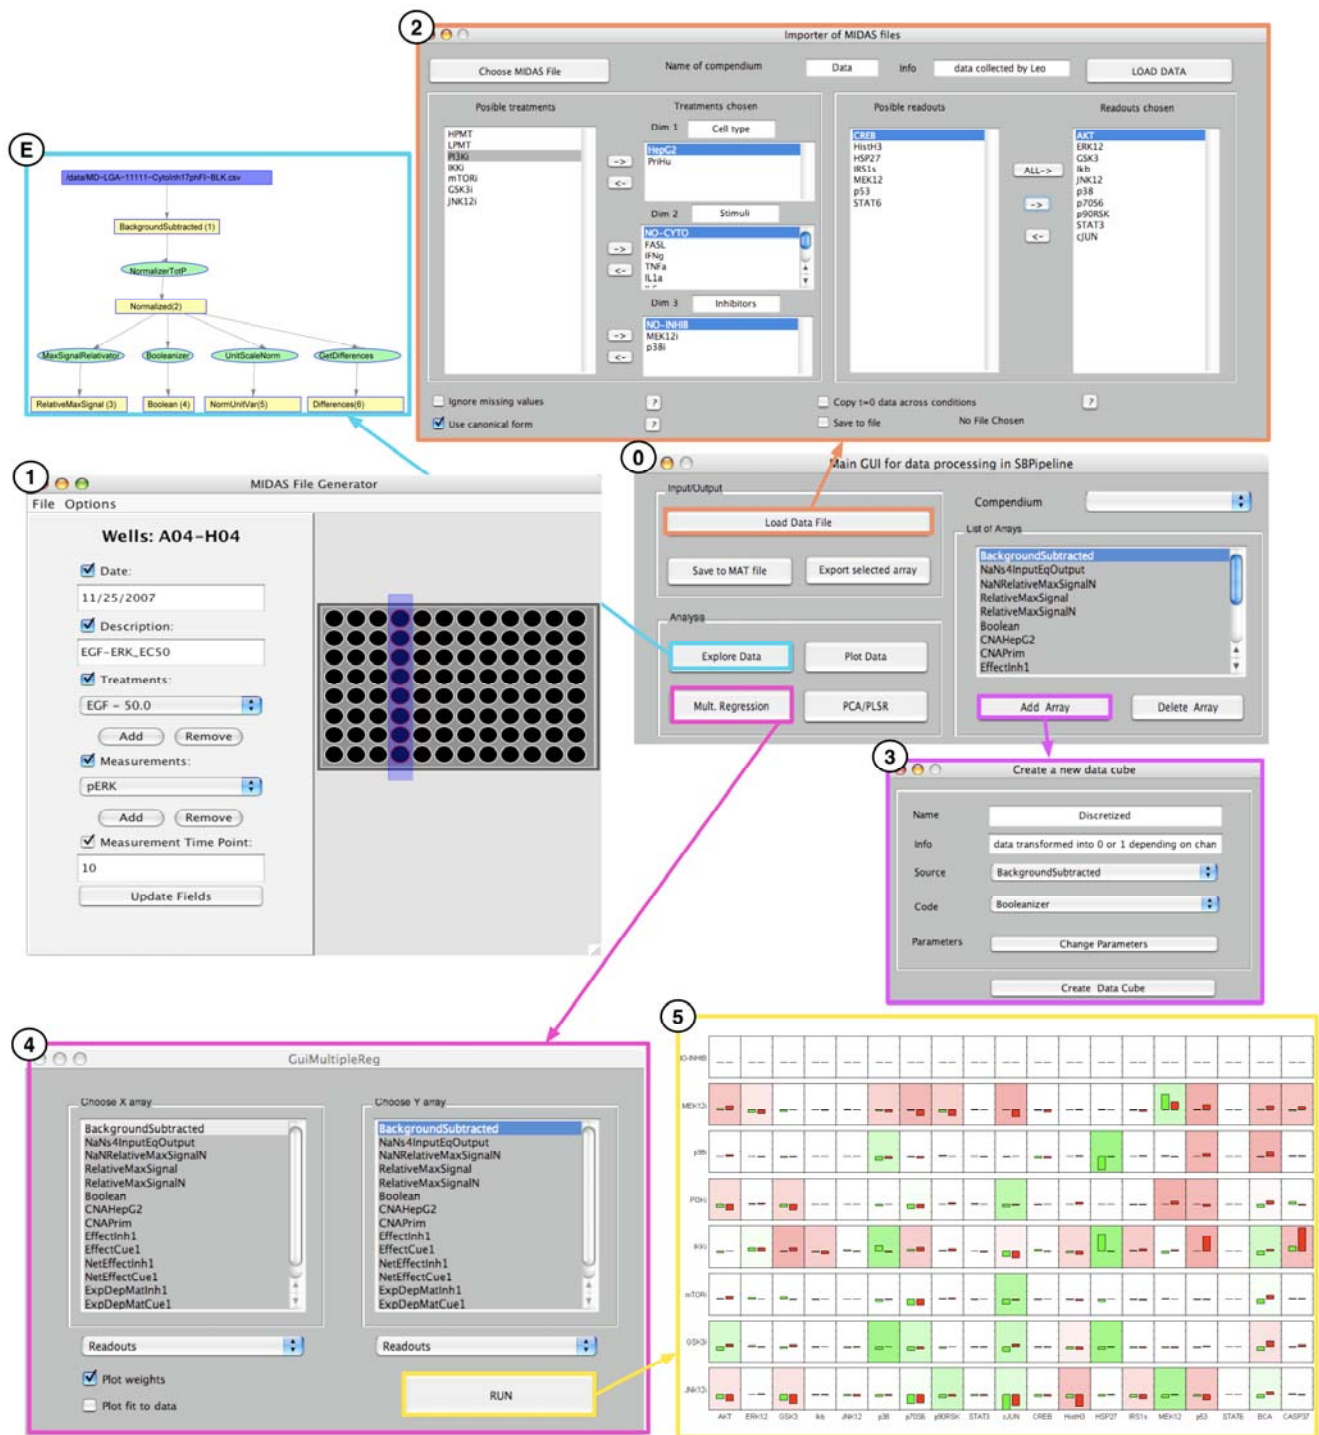

**Fig. S1:** Screenshots of *DataRail*. From the main GUI (0), different User Interfaces can be called, e.g. to (1) create MIDAS files, (2) create new arrays, (3) set up, (4) analyze, (5) develop a multiple regression model. The GUI for creating MIDAS files (1) is a stand-alone Java application. The numbers correspond to the steps in the workflow in Fig. 1. In addition, it is possible to explore the structure of the compendium (E). A function in *DataRail* creates a graph representing all data arrays connected by the functions used to derive them. This visual representation of the provenance is supplemented with the ability to explore the actual values, parameters and code.

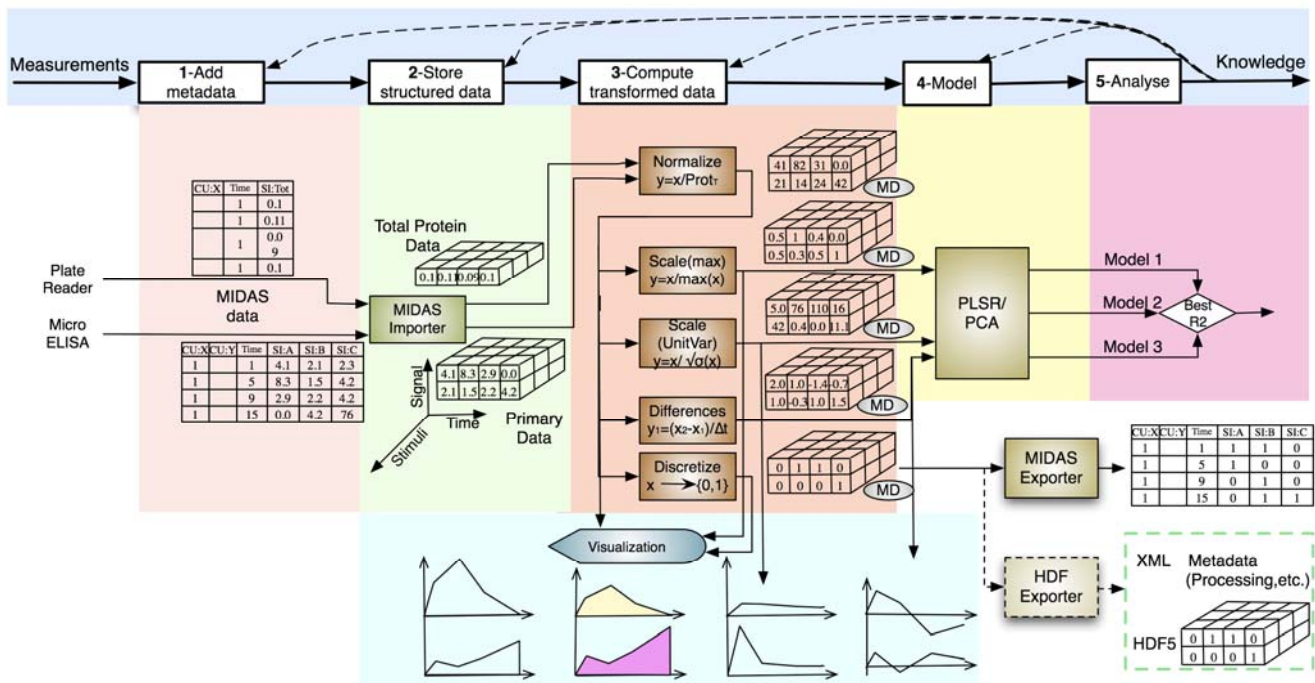

**Fig. S2.** Working scheme of *DataRail*. Data is stored in multidimensional arrays that can be easily transformed into new cubes using different normalization and metric algorithms. In the example in the figure, a set of data is imported and can be visualized on the fly. Then, a number of transformations are performed: signal relative to total protein and to the maximal signal for the same readout, discretized data, and data relative to the variance for the same time point across conditions (unit-variance scaling). Furthermore, a metric (the differences in the signals across time) is computed. Every data array carries all the information (metadata-MD tag in the Figure) concerning the transformations performed to create it. When an array is exported in MIDAS format, this metadata is lost. An export using HDF5 or XML is under preparation that will preserve all the metadata. Plots based on one or more arrays can be easily generated; here, the discretized data is used to characterize the dynamics, and this information is encoded in the coloring of the plots (see also Figure 4 in the main text).

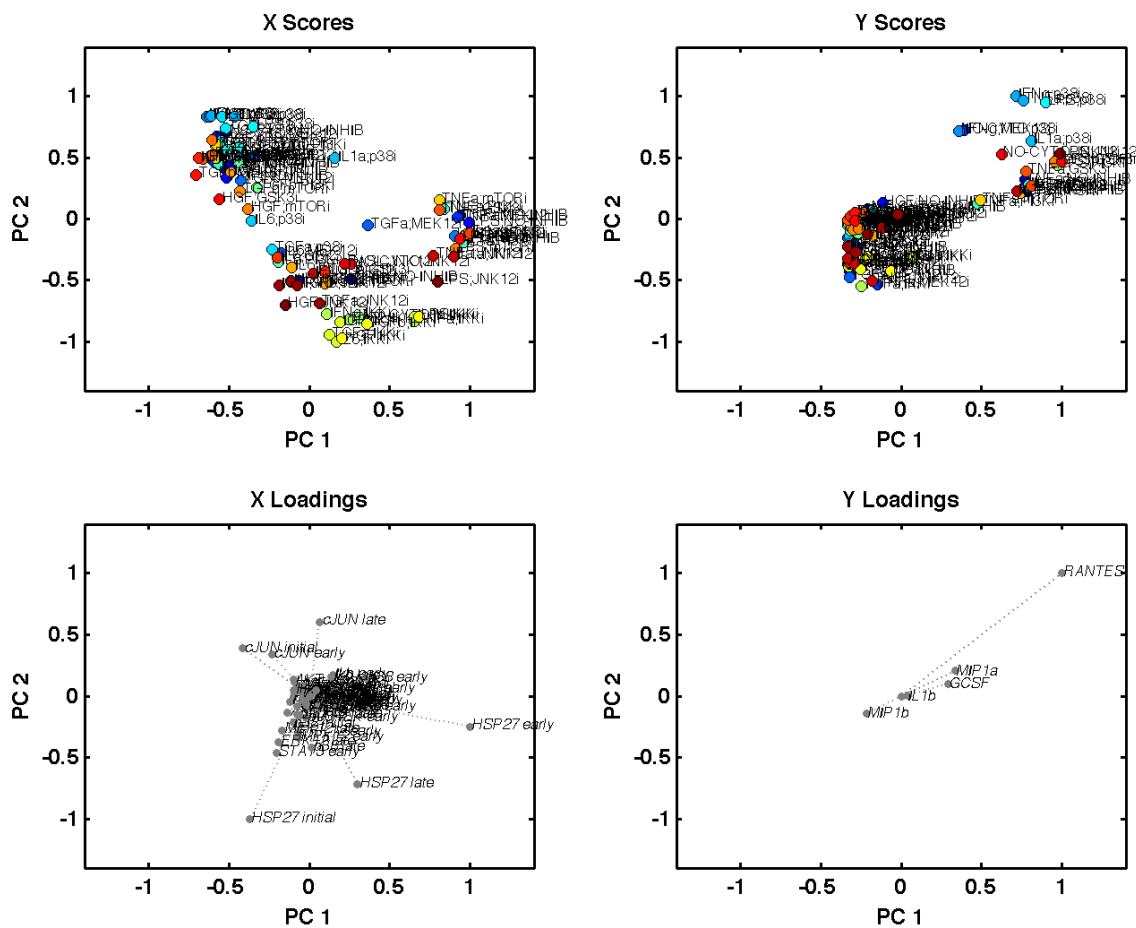

**Fig. S3.** Scores and loading plots for the best PLSR model. The scores (top plots) and loadings (bottom plots) for the phosphorylation data (“X” inputs, left plots) and cytokine data (“Y” outputs, right plots) indicate how treatment conditions and measurements map onto the two principal components of the PLSR model. Treatment conditions that result in similar input or output measurements cluster together in the scores plots. Phosphorylation measurements that are important for prediction are located farther from the origin in the X loadings plot.

**Table S1.** Eight compendia that we have assembled from research in our lab and processed with *DataRail*. Abbreviations—cyto: cytokine concentration; DNA: DNA content; inh: small-molecule inhibitors; lig: ligands; lines: cell lines; pp: phosphoprotein concentration; rep: replicates; time: time points; cl: cellular location. The largest data set could be loaded in less than 3 minutes on a desktop computer.

| Description    | Measurement Types                       | Data Points | Treatment Dimensions              | Data Acquisition Dimension                                                         |
|----------------|-----------------------------------------|-------------|-----------------------------------|------------------------------------------------------------------------------------|
| Liver CSR      | bead-based immunoassay, plate reader    | 36,000      | 3 time x 11 lig x 8 inh x 2 lines | 70 = 50 cyto + 17 pp + 3 phenotypic                                                |
| Liver toxicity | bead-based immunoassay, plate reader    | 23,000      | 5 time x 6 lig x 11 drugs         | 69 = 50 cyto + 17 pp + 2 phenotypic                                                |
| Apoptosis      | plate reader                            | 15,000      | 12 time x 6 lig x 8 inh x 2 rep   | 13 = 9 pp + 4 protein                                                              |
| EGFR           | Quantitative microscopy                 | 1,626,084   | 6 time x 3 cl x 2 channels        | 1 = 1pp $\approx$ 2800 cells/well<br>10 = 4 pp + 5 protein + DNA ; 1000 cells/well |
| EGFR           | quantitative microscopy                 | 480,000     | 6 time x 8 lines                  |                                                                                    |
| EGFR           | bead-based immunoassay                  | 5,000       | 6 time x 2 lig x 8 lines          | 55 = 50 cyto + 5 pp                                                                |
| Macrophages    | bead-based immunoassay                  | 24,000      | 12 time x 15 lig x 2 rep          | 67 = 50 cyto + 17 pp                                                               |
| Apoptosis      | kinase assay, immunoblot, Ab microarray | 10,000      | 13 time x 12 lig x 3-6 rep        | 19 = 10 pp + 9 protein                                                             |

**Table S2.** Example of MIDAS file. The file comprises a small subset of the data of the Liver CSR compendium.

| TR:<br>HepG<br>2 | TR:<br>PriHu | TR:<br>NOCY<br>TO | TR:<br>FASL | TR:<br>IFN<br>g | TR:<br>LP<br>S | TR:<br>NOIN<br>H | TR:<br>MEK1<br>2i | TR:<br>p38<br>i | TR:<br>PI3<br>Ki | TR:<br>IKK<br>i | TR:<br>mTO<br>Ri | TR:<br>GSK3<br>i | TR:<br>JNK12<br>i | DA:<br>AKT | DA:<br>ERK1<br>2 | DA:<br>GSK<br>3 | DV:<br>AK<br>T | DV:<br>ERK1<br>2 | DV:<br>GSK<br>3 |
|------------------|--------------|-------------------|-------------|-----------------|----------------|------------------|-------------------|-----------------|------------------|-----------------|------------------|------------------|-------------------|------------|------------------|-----------------|----------------|------------------|-----------------|
|                  | 1            | 1                 |             |                 |                | 1                |                   |                 |                  |                 |                  |                  |                   | 0          | 0                | 0               | 5578           | 275              | 1123            |
|                  | 1            | 1                 |             |                 |                |                  | 1                 |                 |                  |                 |                  |                  |                   | 0          | 0                | 0               | 4544           | 89               | 905             |
|                  | 1            | 1                 |             |                 |                |                  |                   | 1               |                  |                 |                  |                  |                   | 0          | 0                | 0               | 5108           | 240              | 945             |
|                  | 1            | 1                 |             |                 |                |                  |                   |                 | 1                |                 |                  |                  |                   | 0          | 0                | 0               | 2796           | 212              | 601             |
|                  | 1            | 1                 |             |                 |                |                  |                   |                 |                  | 1               |                  |                  |                   | 0          | 0                | 0               | 4409           | 266              | 931             |
|                  | 1            | 1                 |             |                 |                |                  |                   |                 |                  |                 | 1                |                  |                   | 0          | 0                | 0               | 4269           | 256              | 1101            |
|                  | 1            | 1                 |             |                 |                |                  |                   |                 |                  |                 |                  | 1                |                   | 0          | 0                | 0               | 4215           | 280              | 1020            |
|                  | 1            | 1                 |             |                 |                |                  |                   |                 |                  |                 |                  |                  | 1                 | 0          | 0                | 0               | 3336           | 78               | 384             |
|                  | 1            | 1                 |             |                 |                | 1                |                   |                 |                  |                 |                  |                  |                   | 30         | 30               | 30              | 7100           | 189              | 950             |
|                  | 1            | 1                 |             |                 |                |                  | 1                 |                 |                  |                 |                  |                  |                   | 30         | 30               | 30              | 5942           | 39               | 517             |
|                  | 1            | 1                 |             |                 |                |                  |                   | 1               |                  |                 |                  |                  |                   | 30         | 30               | 30              | 6296           | 136              | 541             |
|                  | 1            | 1                 |             |                 |                |                  |                   |                 | 1                |                 |                  |                  |                   | 30         | 30               | 30              | 4011           | 107              | 549             |
|                  | 1            | 1                 |             |                 |                |                  |                   |                 |                  | 1               |                  |                  |                   | 30         | 30               | 30              | 6862           | 141              | 804             |
|                  | 1            | 1                 |             |                 |                |                  |                   |                 |                  |                 | 1                |                  |                   | 30         | 30               | 30              | 6402           | 160              | 957             |
|                  | 1            | 1                 |             |                 |                |                  |                   |                 |                  |                 |                  | 1                |                   | 30         | 30               | 30              | 5485           | 193              | 720             |
|                  | 1            | 1                 |             |                 |                |                  |                   |                 |                  |                 |                  |                  | 1                 | 30         | 30               | 30              | 4720           | 58               | 340             |
|                  | 1            |                   | 1           |                 |                | 1                |                   |                 |                  |                 |                  |                  |                   | 30         | 30               | 30              | 4551           | 239              | 788             |
|                  | 1            |                   | 1           |                 |                |                  | 1                 |                 |                  |                 |                  |                  |                   | 30         | 30               | 30              | 3799           | 106              | 1085            |
|                  | 1            |                   | 1           |                 |                |                  |                   | 1               |                  |                 |                  |                  |                   | 30         | 30               | 30              | 4577           | 165              | 909             |

**Table S3.** Ranking of models. The normalizations and scaling for the best 60 models are shown.

| <b>Ran<br/>k</b> | <b>R<sup>2</sup></b> | <b>XCube</b> | <b>XProcess</b>             | <b>YCube</b> | <b>YProcess</b>             |
|------------------|----------------------|--------------|-----------------------------|--------------|-----------------------------|
| 1                | 0.5224               | max scale    | mean&variance               | primary      | AUC, mean&variance          |
| 2                | 0.5134               | primary      | mean activ., mean<br>center | primary      | AUC, mean center            |
| 3                | 0.5129               | primary      | mean activ., mean<br>center | primary      | mean center                 |
| 4                | 0.5123               | primary      | mean activ., mean<br>center | primary      | mean activ., mean<br>center |
| 5                | 0.5116               | max scale    | mean activ., mean<br>center | primary      | AUC, mean center            |
| 6                | 0.5106               | max scale    | mean activ., mean<br>center | primary      | mean activ., mean<br>center |
| 7                | 0.5097               | max scale    | mean activ., mean<br>center | primary      | mean center                 |
| 8                | 0.5067               | primary      | mean&variance               | primary      | AUC, mean&variance          |
| 9                | 0.4991               | primary      | slope, mean center          | primary      | AUC, mean&variance          |
| 10               | 0.4952               | primary      | mean activ., mean<br>center | primary      | AUC, mean&variance          |
| 11               | 0.4864               | max scale    | mean&variance               | max scale    | AUC, mean&variance          |
| 12               | 0.4862               | max scale    | slope, mean center          | primary      | AUC, mean&variance          |
| 13               | 0.4852               | primary      | slope, mean center          | max scale    | AUC, mean&variance          |
| 14               | 0.4841               | primary      | mean activ., mean<br>center | max scale    | AUC, mean center            |
| 15               | 0.4826               | primary      | mean activ., mean<br>center | max scale    | mean activ., mean<br>center |
| 16               | 0.4818               | max scale    | mean activ., mean<br>center | max scale    | AUC, mean center            |
| 17               | 0.4804               | max scale    | mean activ., mean<br>center | max scale    | mean activ., mean<br>center |
| 18               | 0.4797               | primary      | mean activ., mean<br>center | max scale    | AUC, mean&variance          |
| 19               | 0.4795               | primary      | mean activ., mean<br>center | max scale    | mean center                 |
| 20               | 0.4761               | max scale    | mean activ., mean<br>center | max scale    | mean center                 |
| 21               | 0.4707               | primary      | mean&variance               | max scale    | AUC, mean&variance          |
| 22               | 0.4675               | max scale    | mean&variance               | primary      | mean activ., mean<br>center |
| 23               | 0.4671               | max scale    | mean&variance               | primary      | AUC, mean center            |
| 24               | 0.459                | max scale    | slope, mean center          | max scale    | AUC, mean&variance          |
| 25               | 0.4554               | max scale    | slope, mean center          | primary      | mean center                 |
| 26               | 0.4544               | max scale    | slope, mean center          | primary      | AUC, mean center            |
| 27               | 0.4535               | max scale    | slope, mean center          | primary      | mean activ., mean<br>center |

|    |        |           |                               |           |                             |
|----|--------|-----------|-------------------------------|-----------|-----------------------------|
| 28 | 0.4466 | max scale | mean activ.,<br>mean&variance | max scale | AUC, mean&variance          |
| 29 | 0.4459 | max scale | mean activ.,<br>mean&variance | primary   | AUC, mean&variance          |
| 30 | 0.4453 | max scale | mean activ., mean<br>center   | primary   | AUC, mean&variance          |
| 31 | 0.4418 | primary   | slope, mean center            | primary   | mean center                 |
| 32 | 0.4368 | max scale | mean&variance                 | max scale | AUC, mean center            |
| 33 | 0.4322 | max scale | slope, mean center            | max scale | AUC, mean center            |
| 34 | 0.431  | max scale | slope, mean center            | max scale | mean activ., mean<br>center |
| 35 | 0.4308 | max scale | mean&variance                 | max scale | mean center                 |
| 36 | 0.4296 | max scale | slope, mean center            | max scale | mean center                 |
| 37 | 0.4284 | max scale | mean activ., mean<br>center   | max scale | AUC, mean&variance          |
| 38 | 0.4249 | primary   | mean center                   | primary   | mean activ., mean<br>center |
| 39 | 0.4243 | primary   | mean&variance                 | primary   | mean activ., mean<br>center |
| 40 | 0.4211 | primary   | mean center                   | primary   | AUC, mean&variance          |
| 41 | 0.4204 | primary   | mean&variance                 | primary   | mean center                 |
| 42 | 0.4195 | max scale | mean activ., variance sc.     | max scale | AUC, mean&variance          |
| 43 | 0.4171 | primary   | slope, mean center            | max scale | mean center                 |
| 44 | 0.4163 | max scale | mean activ., variance sc.     | primary   | AUC, mean&variance          |
| 45 | 0.4137 | primary   | mean activ.,<br>mean&variance | max scale | AUC, mean&variance          |
| 46 | 0.413  | max scale | slope, mean&variance          | primary   | AUC, mean&variance          |
| 47 | 0.406  | max scale | mean center                   | primary   | AUC, mean center            |
| 48 | 0.4053 | max scale | mean center                   | primary   | mean center                 |
| 49 | 0.4007 | primary   | mean center                   | max scale | mean center                 |
| 50 | 0.3996 | max scale | slope, mean&variance          | max scale | AUC, mean&variance          |
| 51 | 0.3918 | primary   | mean center                   | max scale | AUC, mean&variance          |
| 52 | 0.3915 | primary   | slope, mean&variance          | primary   | AUC, mean&variance          |
| 53 | 0.3885 | primary   | mean&variance                 | max scale | mean center                 |
| 54 | 0.3882 | max scale | mean activ., mean<br>center   | primary   | slope, mean center          |
| 55 | 0.3865 | primary   | mean activ., variance sc.     | max scale | AUC, mean&variance          |
| 56 | 0.38   | primary   | mean activ., mean<br>center   | primary   | slope, mean center          |
| 57 | 0.3754 | primary   | mean activ., variance sc.     | primary   | AUC, mean&variance          |
| 58 | 0.3733 | primary   | slope, mean&variance          | max scale | AUC, mean&variance          |
| 59 | 0.3683 | max scale | slope, variance sc.           | primary   | AUC, mean&variance          |
| 60 | 0.3659 | max scale | mean&variance                 | primary   | slope, mean center          |



**Table S4.** Comparison of metrics and scaling methods. The mean  $R^2$  value is listed for all models that use a particular metric or scaling method. Note that negative  $R^2$  values occur in poor models that do not include a constant offset.

| <b>Model Class</b> | <b>Mean <math>R^2</math></b> |
|--------------------|------------------------------|
| primary X          | -0.31                        |
| max scale X        | -0.32                        |
| primary Y          | -0.42                        |
| max scale Y        | -0.22                        |
|                    |                              |
| mean center X      | -0.41                        |
| variance sc X      | -0.04                        |
| mean&variance X    | -0.41                        |
| time series X      | -0.37                        |
| AUC X              | -0.27                        |
| slope X            | -0.27                        |
| mean activ. X      | -0.35                        |
|                    |                              |
| mean center Y      | 0.27                         |
| variance sc Y      | -1.38                        |
| mean&variance Y    | 0.23                         |
| time series Y      | -0.5                         |
| AUC Y              | -0.64                        |
| slope Y            | 0.01                         |
| mean activ. Y      | -0.1                         |
